# Supplementary material
Source: MDPI journal article supplement (https://www.mdpi.com/2073-4395/10/8/1080)
Supplement: s1 [file s1]

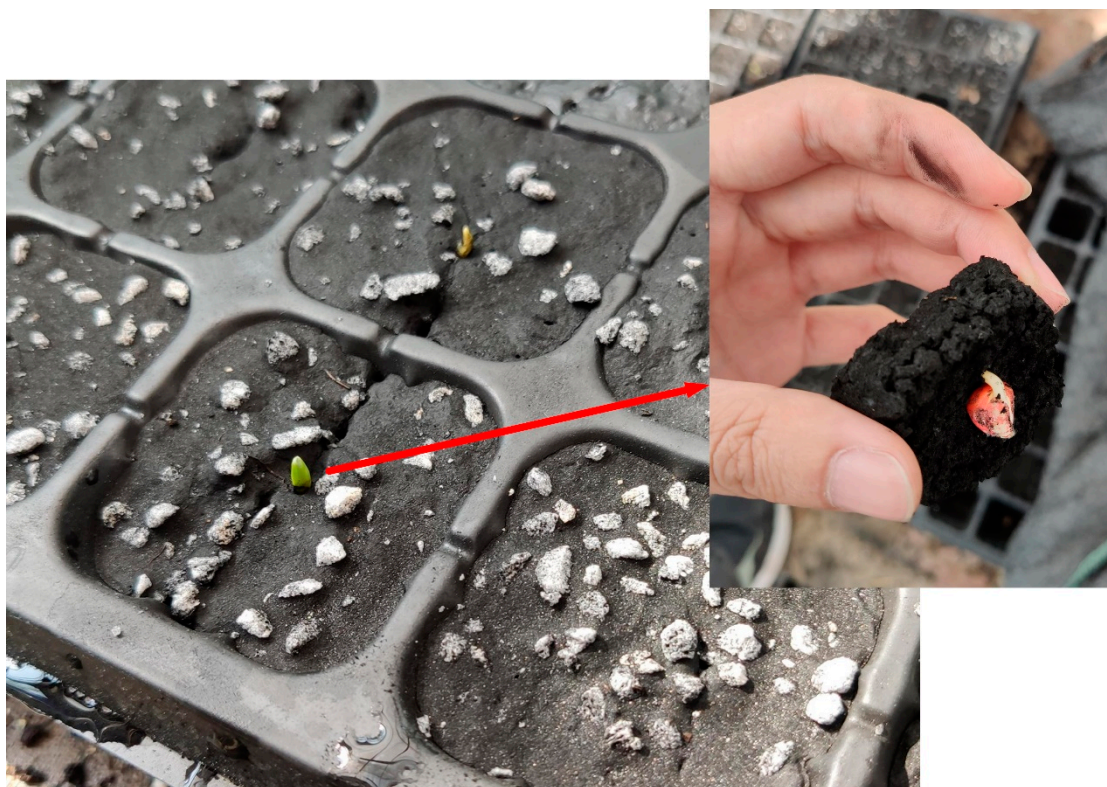

**Figure S1. The seedling raised in 100% biochar.**

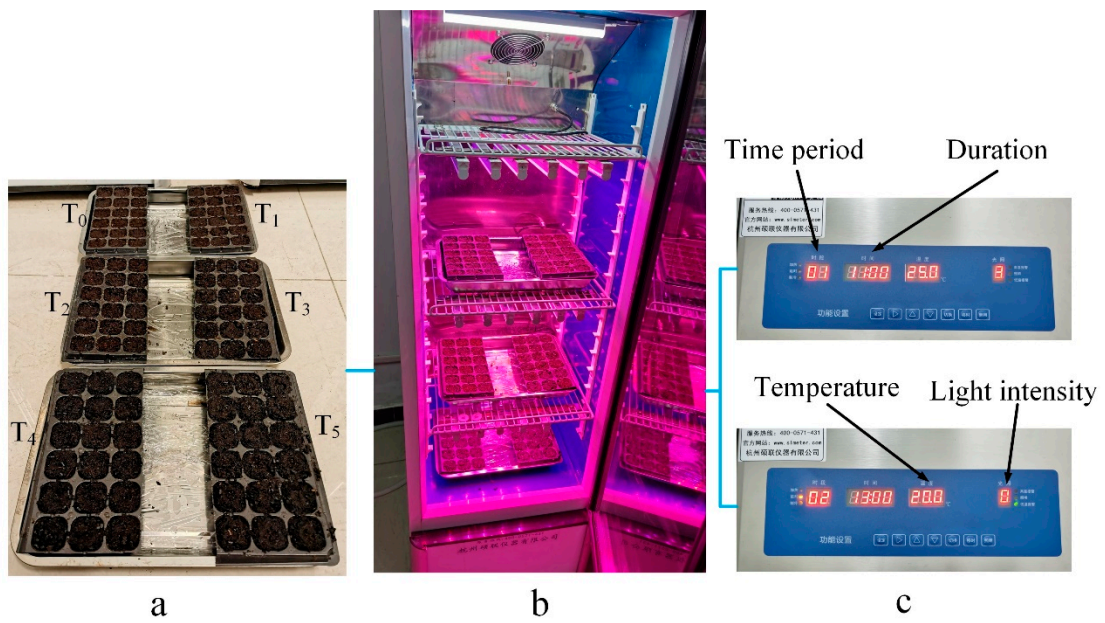

**Figure S2. The cultivation of the substrates. (a)** The substrate absorbed enough water; **(b)** the incubator; **(c)** parameter setting of the incubator.

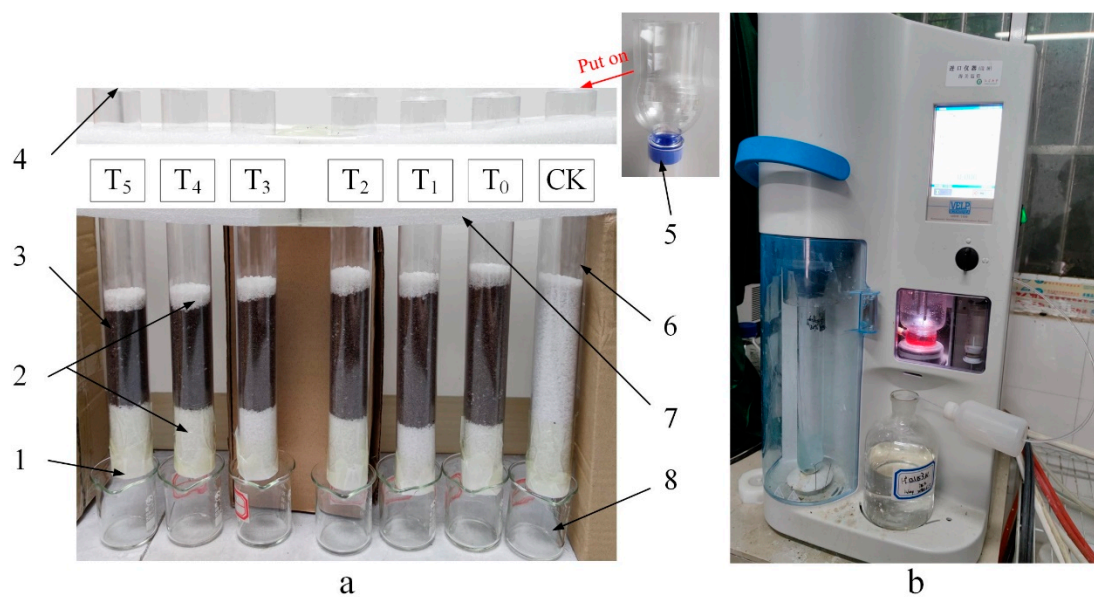

**Figure S3. Determination of nitrogen by soil column leaching method. (a)** The soil column leaching method; **(b)** Kjeldahl azotometer; 1) Nylon net; 2) Quartz sand; 3) Substrate; 4) Polyethylene film; 5) Simple drip irrigation device; 6) PVC pipe; 7) Frame; 8) Breaker.

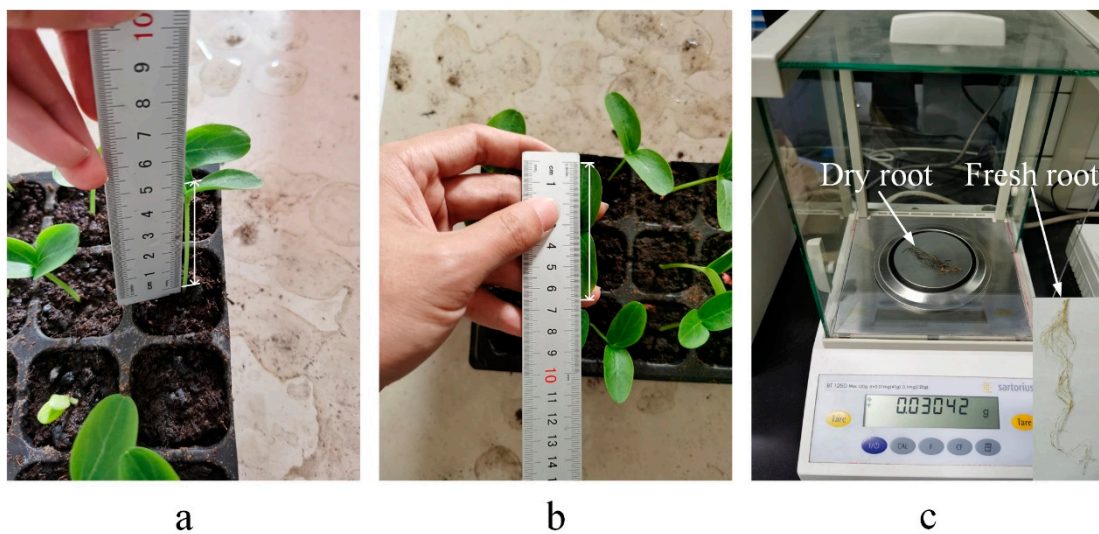

**Figure S4. Determination of the seedling growth parameters. (a)** Measurement of plant height; **(b)** Measurement of leaf exhibition; **(c)** Weight of the root dry matter.



Electronic universal

testing machine

Seedling

Clamping apparatus

Root scanning photo

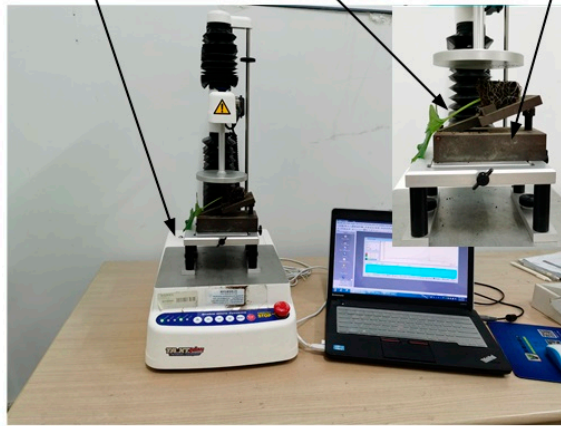

a

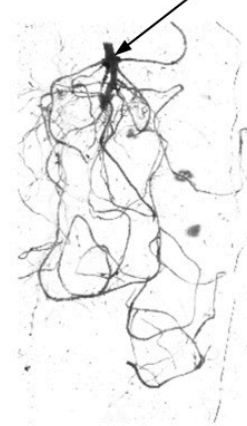

b

Paraffin block

Root-tip

Root-tip slice

Glass slide

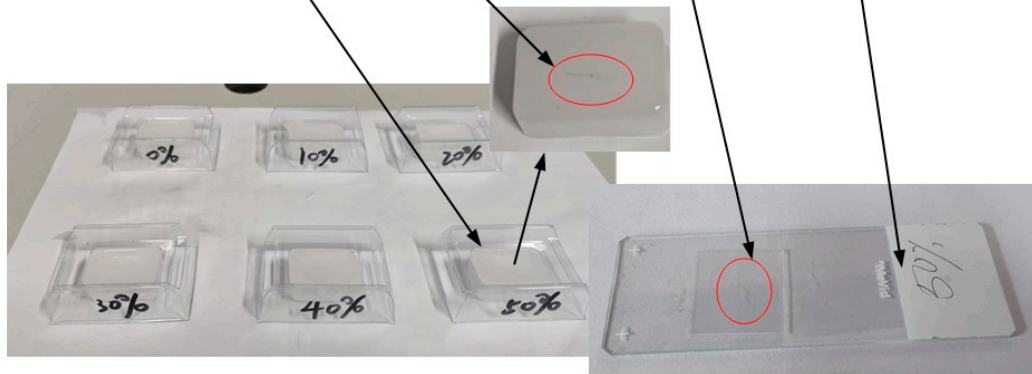

c

**Figure S5. Analysis of the root system.** (a) Measurement of seedling's compressive strength; (b) Scanning and analysis of root system; (c) Measurement of the length of root-tip cells.

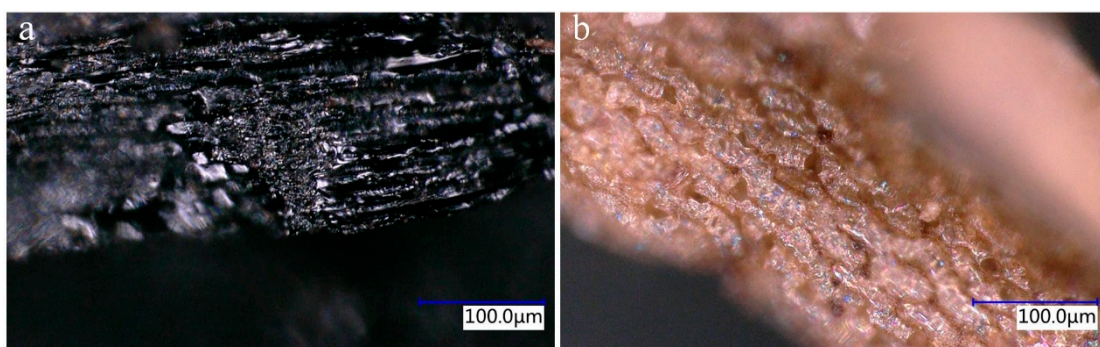

**Figure S6. Surface characteristics of substrate under the microscope. (a)**Surface characteristic of biochar; **(b)** Surface characteristic of peat.
